# Supplementary material
Source: Springer Nature journal article supplement (https://www.springermedizin.de/resource/supplementary/12874_2009_343_MOESM1_ESM.pdf/9434270)
Supplement: MOESM1 [file 9434270]

| If your current step count is: | Then your level is: | And your weekly step count targets are: |        |        |              |              |              |        |              |
|--------------------------------|---------------------|-----------------------------------------|--------|--------|--------------|--------------|--------------|--------|--------------|
|                                |                     | Week 1                                  | Week 2 | Week 3 | Week 4       | Week 5       | Week 6       | Week 7 | Week 8       |
| <b>Less than 2000</b>          | Level 1             | 3000                                    | 4000   | 5000   | 6000         | 7000         | 8000         | 9000   | <b>10000</b> |
| <b>2000 to 3000</b>            | Level 2             | 4000                                    | 5500   | 7000   | 8000         | 9000         | <b>10000</b> |        |              |
| <b>3000 to 4000</b>            | Level 3             | 5000                                    | 6500   | 8000   | 9000         | <b>10000</b> |              |        |              |
| <b>4000 to 5000</b>            | Level 4             | 6000                                    | 7500   | 9000   | <b>10000</b> |              |              |        |              |
| <b>5000 to 6000</b>            | Level 5             | 7000                                    | 8000   | 9000   | <b>10000</b> |              |              |        |              |
